# Supplementary material
Source: Royal Society of Chemistry journal article supplement (doi:10.1039/d6tc00611f)
Supplement: d6tc00611f1.pdf [file d6tc00611f1.pdf]

## **Supplementary Information**

### **An AIE-Active Multi-Stimuli Responsive Fluorophore with Solvatochromic, Acidochromic, and Ultrasensitive Cu<sup>2+</sup>-Sensing Capabilities: Anti-Counterfeiting, Latent Fingerprint, Bioimaging and Food Samples Analysis**

Pankaj Haloi<sup>a</sup>, Ram Kumar Mandal<sup>a</sup>, Abhinav Jain<sup>a</sup>, Jebiti Haribabu<sup>b</sup>, Daniel Moraga<sup>c</sup>,  
Pranjit Barman<sup>a\*</sup>

<sup>a</sup>Department of Chemistry, National Institute of Technology Silchar, Silchar, Cachar-788010 Assam

<sup>b</sup>Faculty of medicine, University of Atacama, Los Carreras 1579, 1532502, Copiapo, Chile

<sup>c</sup>Laboratorio de Fisiología, Departamento de Ciencias Biomédicas, Facultad de Medicina, Universidad de Tarapacá, Arica 1000000, Chile

**\*Author for correspondence:** Pranjit Barman

(Email: [barmanpranjit@yahoo.co.in](mailto:barmanpranjit@yahoo.co.in))

### **Table of Contents**

1. Experimental Section
  - 1.1. Reagents and Chemicals
  - 1.2. Instrumentation
  - 1.3. Characterization of HP
  - 1.4. Preparation of Stock Solutions
  - 1.5. Theoretical Calculations
  - 1.6. Calculation of Quantum Yield
  - 1.7. Determination of limit of detection (LOD)
  - 1.8. Determination of Stern-volmer constant ( $K_{SV}$ )

**1.9.** Determination of Binding Constant ( $K_b$ )

**1.10.** In-vitro cell culture

**1.11.** Cell viability assay

**1.12.** Cellular uptake study

**1.13.** Preparation of Food Samples

### **List of Figures**

**Fig. S1.** FT-IR spectra of **HP**

**Fig. S2.**  $^1\text{H-NMR}$  spectra of **HP**

**Fig. S3.**  $^{13}\text{C-NMR}$  spectra of **HP**

**Fig. S4.** ESI-MS spectra of **HP**

**Fig. S5.** Fluorescence spectra of **HP** with and without presence of copper in different pH

**Fig. S6.** Stern-volmer plot at high copper ion concentration

**Fig. S7.** Stern-volmer plot at low copper ion concentration

**Fig. S8.** BH-plot for binding constant determination

**Fig. S9.** Job's plot for binding stoichiometry determination

**Fig. S10.** ESI-MS spectra of (**HP**+ $\text{Cu}^{2+}$ ) complex

**Fig. S11.** Bar diagram of interference study

**Fig. S12.** Fluorescence spectra of reversibility study

**Fig. S13.** Cell viability assay of probe **HP**

## **1. Experimental Section**

### **1.1 Reagents and Chemicals**

The solvents employed in the spectral experiments were obtained from Sigma-Aldrich and were of spectrophotometric grade. The other chemicals used in this research were sourced from commercial suppliers and were used without further purification.

## 1.2 Instrumentation

The IR spectral data was recorded by Perkin Elmer MIR/FIR-FT-IR spectrophotometer.  $^1\text{H}$  and  $^{13}\text{C}$  nuclear magnetic resonance spectrums were recorded using a JEOL JNM ECS400 NMR spectrometer in  $\text{CDCl}_3$  solvent at 400 MHz. The chemical shift ( $\delta$ ) values were reported in ppm using TMS as reference standard. The ESI positive mass spectrum was taken from XEVOG2-XS QTOF spectrometer in DMSO solvent. UV-visible absorption spectrums were obtained by using a Cary 60 absorption spectrophotometer. A HITACHI-F4600 spectrophotometer was utilized to record the fluorescence emission spectrums.

## 1.3 Characterization

Yield: 90%; Pale yellowish-orange crystalline solid; melting point: 171-173°C.

FTIR ( $\nu$ ,  $\text{cm}^{-1}$ ): 3509 (O-H); 2998 (aromatic C-H); 1601 (C=N); 1436 (Aromatic C=C); 1151 (C-O) (**Fig. S1**).

$^1\text{H}$  NMR (400 MHz,  $\text{CDCl}_3$ ) (ppm):  $\delta$  12.99 (s, 1H), 9.40 – 9.32 (s, 1H), 7.17 – 6.93 (m, 11H), 2.85 – 2.79 (d,  $J = 0.5$  Hz, 3H) (**Fig. S2**).

$^1\text{H}$  NMR (400 MHz, CHLOROFORM-*D*)  $\delta$  9.40 – 9.32 (s, 1H), 7.17 – 6.93 (m, 11H), 2.85 – 2.79 (d,  $J = 0.5$  Hz, 3H).

$^{13}\text{C}$  NMR (126 MHz,  $\text{DMSO-}D_6$ ) (ppm):  $\delta$  170.67, 165.22, 162.22, 158.05, 135.38, 131.58, 129.50, 129.34, 128.67, 128.52, 128.39, 122.80, 118.85, 114.23, 78.99 (**Fig. S3**).

ESI-Mass: Base peak was obtained at  $m/z = 329.45$  [ $(\text{C}_{16}\text{H}_{16}\text{N}_2\text{O}_2) + \text{H}$ ] $^+$  = 329.12] which confirmed the formation of the **HP** (**Fig. S4**).

## 1.4 Preparation of Stock Solutions

~1 mmol stock solutions of **HP** was prepared in four solvents having different polarity. For absorbance and emission analysis, the stock solutions of **HP** was diluted to a concentration of about ~50  $\mu\text{M}$  in a suitable solvent. A combination of ~50  $\mu\text{M}$  THF-water solution was prepared for aggregation investigations. To conduct pH tests, a 1 mmol stock solution was diluted to form

a ~50  $\mu\text{M}$  concentration in 1:9 THF-aqueous buffer solution. The pH solution was made by the combination of  $\text{Na}_2\text{HPO}_4$  and  $\text{NaH}_2\text{PO}_4$  produced a 0.1 M phosphate buffer. The metal ion solutions of about ~10 mmol were developed in the water medium. Finally, the absorbance and emission spectrum were captured after 10 minutes of mixing [1].

### 1.5 Theoretical Calculations

The quantum chemical investigations were conducted using the GAUSSIAN 16 software [2]. The B3LYP 6-311g+(d, p) basis set was utilized for carrying out the optimization of the ground state configuration of **HP** [3]. But, for optimizing the ground state of the complexes of **HP**, the LanL2DZ basic set was selected [4].

### 1.6 Calculation of Quantum Yield

The fluorescence quantum yield was determined by utilizing Rhodamine B as the standard fluorophore [5].

$$\phi_u = \left( \frac{A_s F_u n_u^2}{A_u F_s n_s^2} \right) \phi_s$$

Where ' $\phi_u$ ' is the quantum yield value of the unidentified fluorophore, ' $\phi_s$ ' is the quantum yield value of the fluorophore taken as the standard reference ( $\phi_s = 0.68$  in ethanol medium). ' $A_u$ ' and ' $A_s$ ' are the absorbance values at the excitation wavelength for the unknown and the standard fluorophore, respectively. ' $F_u$ ' and ' $F_s$ ' are the integrated area of fluorescence intensity for the unknown and the standard fluorophore, respectively. ' $n_u$ ' and ' $n_s$ ' are the refractive index of the unknown and the standard fluorophore, respectively [6].

### 1.7 Determination of Limit of Detection (LOD)

The following equation was used to determine the LOD with the help of fluorescence titration,

$$\text{LOD} = 3\sigma/S$$

where  $\sigma$  stands for standard deviation value of blank measurements, and the S denotes slope of the calibration plot of  $I_0 - I$  vs  $\text{Cu}^{2+}$  ion concentration, where  $I_0$  &  $I$  were emission intensity of ligand in absence and presence of  $\text{Cu}^{2+}$  ions respectively.

### 1.8 Determination of Stern-Volmer constant ( $K_{sv}$ )

The Stern-Volmer formula has been implemented to estimate the degree of fluorescence quenching caused by adding copper ions.

$$\frac{I_o}{I} = 1 + K_{sv} \times [Cu^{2+}]$$

Where, ' $K_{sv}$ ' is the Stern-Volmer constant, ' $I_o$ ' denotes the intensities of fluorescence in the absence of  $Cu^{2+}$  ions at different concentrations and ' $I$ ' represents intensities of fluorescence presence of  $Cu^{2+}$  ions at different concentrations [7].

### 1.9 Determination of Binding Constant ( $K_b$ )

Based on fluorometric titration data, binding constant ( $K_b$ ) was determined by Benesi-Hildebrand equation,

$$\frac{1}{I - I_o} = \left[ \frac{1}{I_{max} - I_o} \right] \left[ \frac{1}{K_b \cdot C} + 1 \right]$$

where  $I_o$  denotes emission intensity of **HP** alone,  $I$  denote emission intensity of sensor **HP** in different equivalents of  $Cu^{2+}$  ions,  $I_{max}$  is emission intensity of sensor **HP** when 2 equivalents of  $Cu^{2+}$  ions was added and  $C$  is copper ion concentration [8].

### 1.10 In-vitro cell culture

Hela cells were procured from National Centre for Cell Science (NCCS), Pune. For routine maintenance, cells were cultured in Dulbecco's Modified Eagle's Medium (DMEM) and incubated in a humidified atmosphere at 37 °C supplied with 5%  $CO_2$ .

### 1.11 Cell viability assay

Hela cells were treated with probe **HP** in varying concentration for 48 h. After the treatment, 3-(4,5-Dimethylthiazol-2-yl)-2,5-Diphenyltetrazolium Bromide (MTT) was added to each well and incubated for about 2 h. Following incubation period, the purple color formazon crystals formed were dissolved using DMSO. Colorimetric analysis was conducted using a multi-well plate reader (GloMax microplate reader, Promega) by measuring the absorbance at ~560 nm for the sample

and ~600 nm for background subtraction. Cell viability was calculated using the provided equation.

$$\% \text{ of Cell viability} = \frac{(A_{560})_{\text{sample}}}{(A_{560})_{\text{control}}} \times 100$$

### 1.12 Cellular uptake study

For the uptake study, HeLa cells were cultured on coverslips in 6-well plates at a density of  $1 \times 10^5$  cells/well and allowed to adhere for 24 h. After 24 h, cells were treated with probe **HP** for another 6 h. After the incubation period, the cells were washed with PBS and fixed with a 4% formaldehyde solution for 10 minutes. After fixation, the cells were washed again with PBS and examined using confocal microscopy (ZEISS LSM-880). For Copper ion sensing, following 6 h incubation, cells were exposed to  $\text{Cu}^{2+}$  for 30 mins and examined using confocal microscopy.

### 1.13 Preparation of Food Samples

For food sample preparation, fresh raw food materials were first processed using a juice mixer to obtain the corresponding food extracts. An aliquot of 5 mL of the prepared juice was transferred into a 10 mL autoclave digestion reactor. To this, 2.25 mL of concentrated nitric acid and 0.25 mL of 30% (v/v) hydrogen peroxide were carefully added. The sealed reactor was heated in an oven at 185 °C for 5 h to achieve complete digestion. After cooling, the resulting clear digest was diluted to a final volume of 25 mL using Tris-HCl buffer (pH 5) prior to analysis.

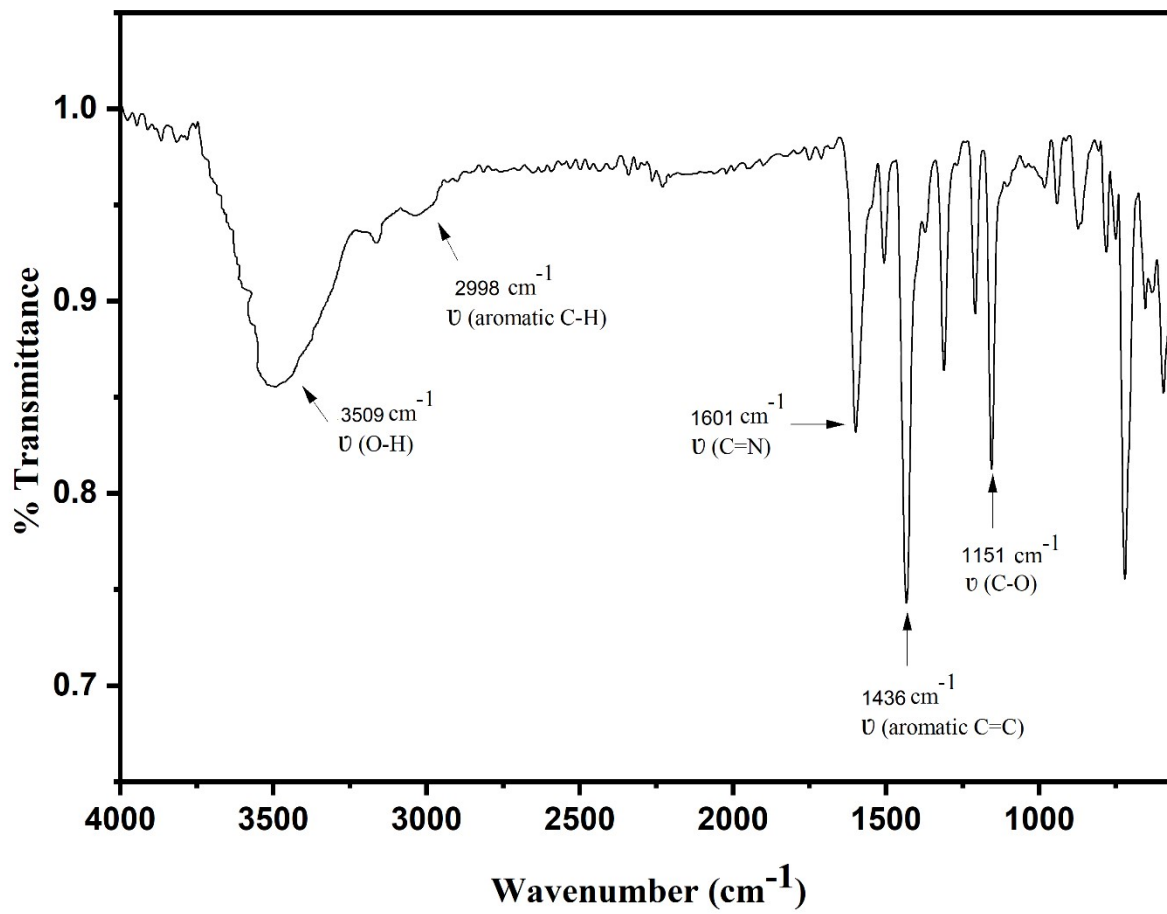

**Fig. S1.** FT-IR spectra of HP

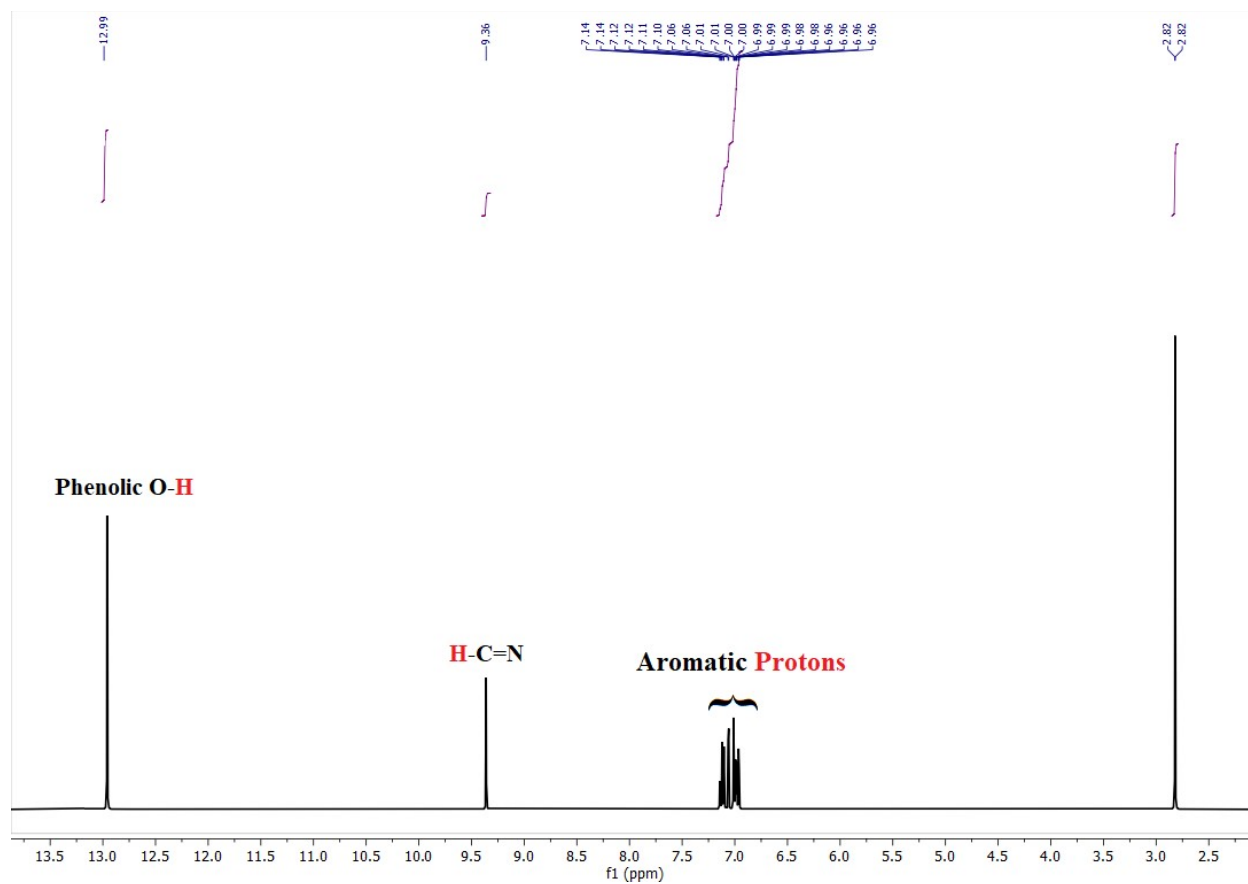

**Fig. S2.**  $^1\text{H-NMR}$  spectra of HP

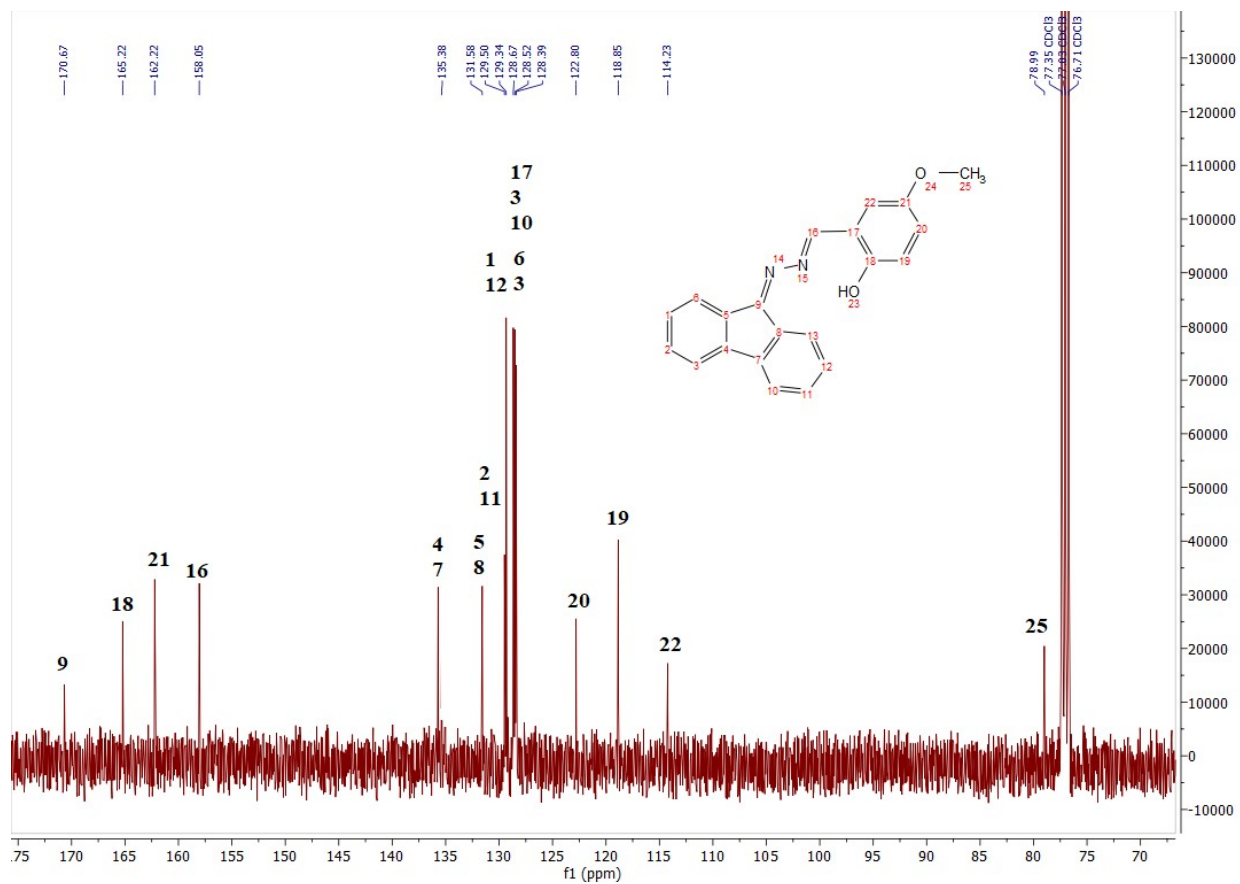

Fig. S3. <sup>13</sup>C-NMR spectra of HP

OTHER  
SBL (R) 47 (0.812) Cm (45:57)

NIT Rourkela

TOF MSMS 365.00ES+  
8.63e6

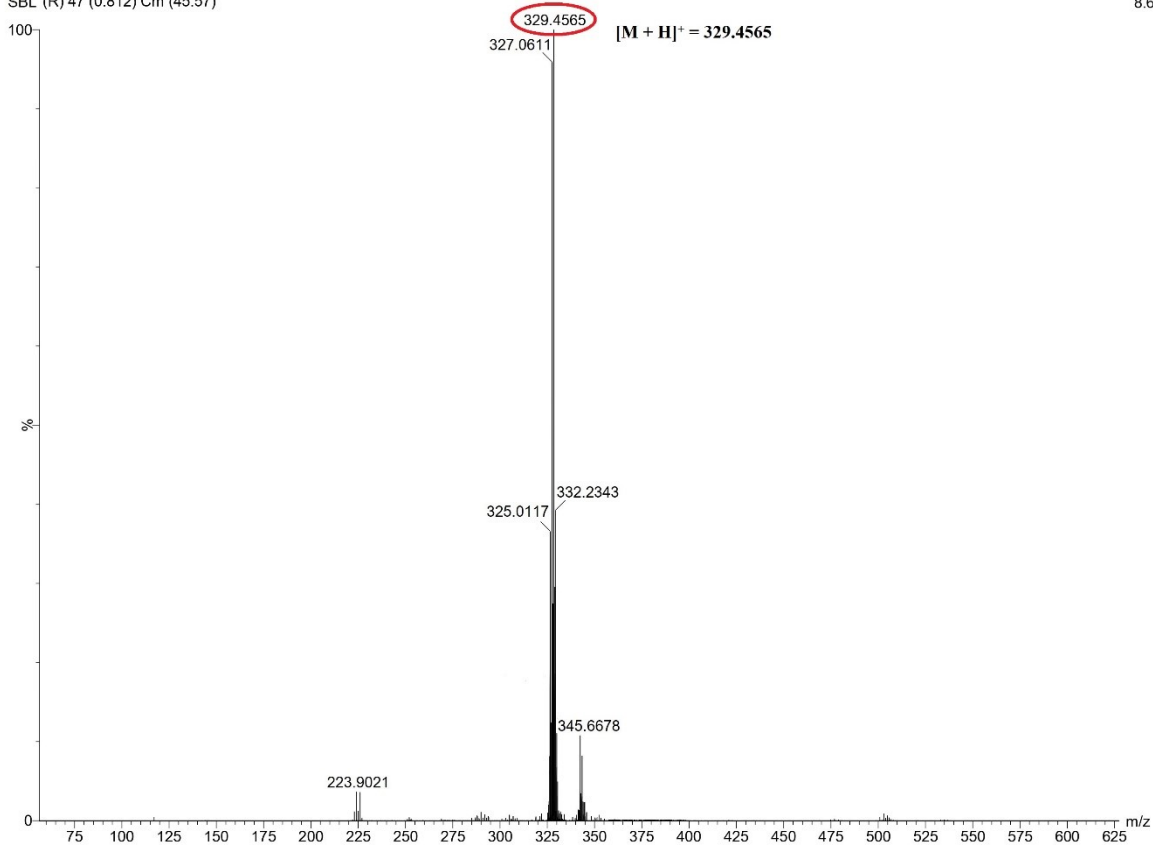

**Fig. S4.** ESI-MS spectra of **HP**

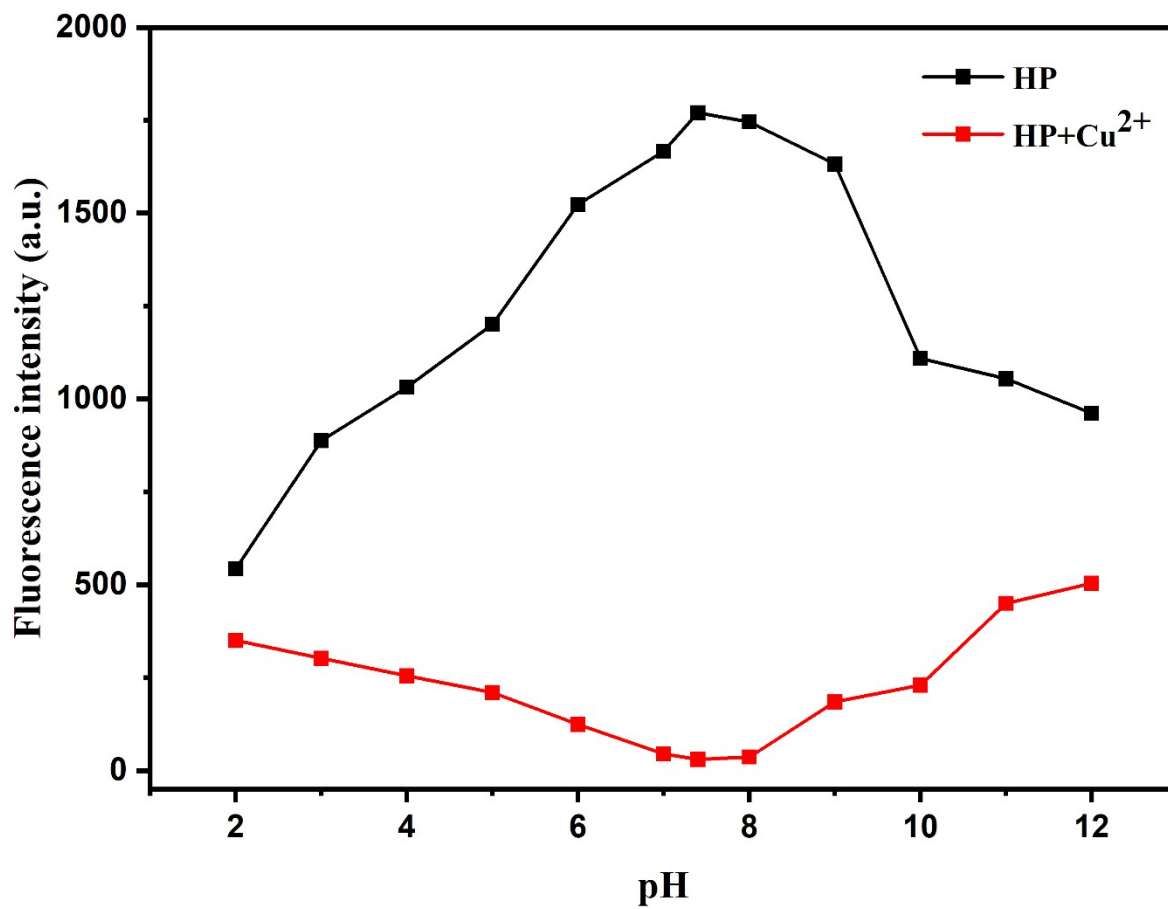

Fig. S5. Fluorescence spectra of **HP** with and without presence of copper in different pH

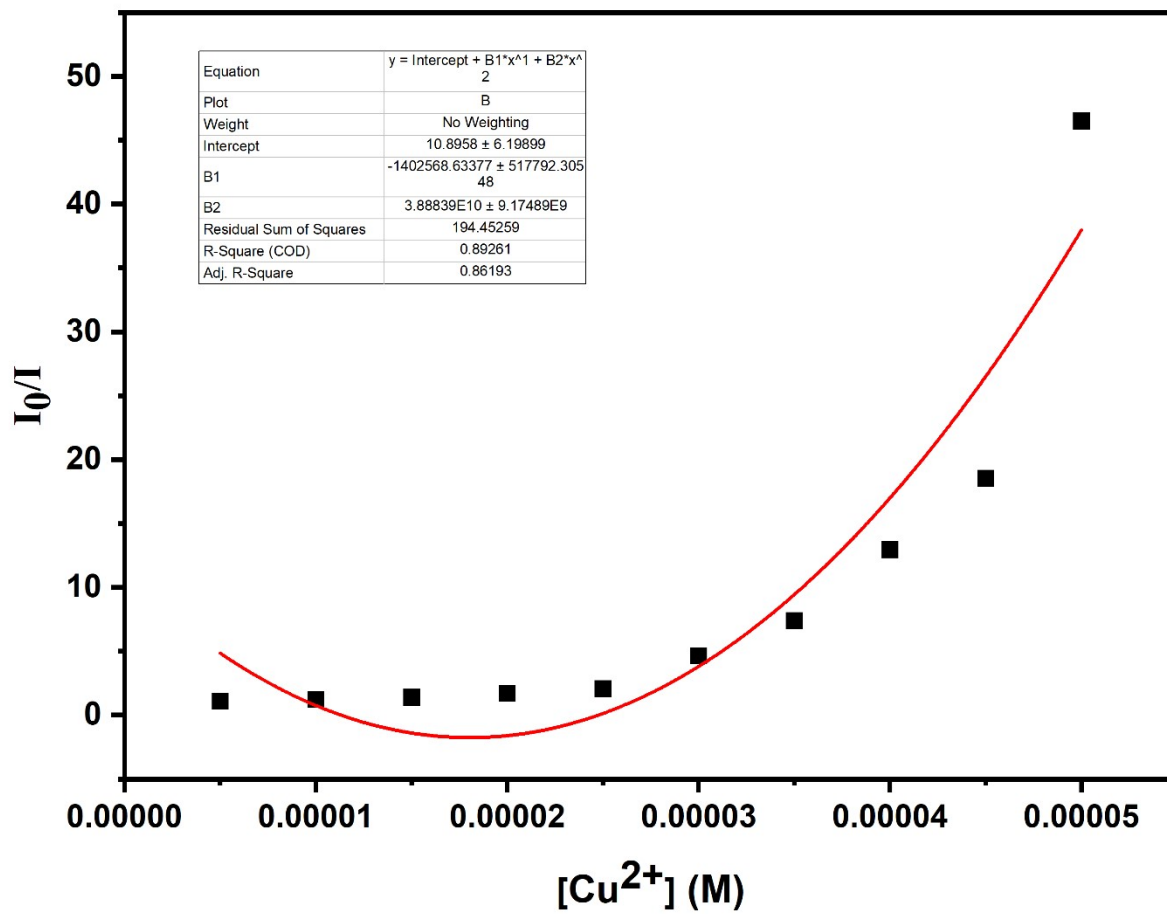

Fig. S6. Stern-volmer plot at high copper ion concentration

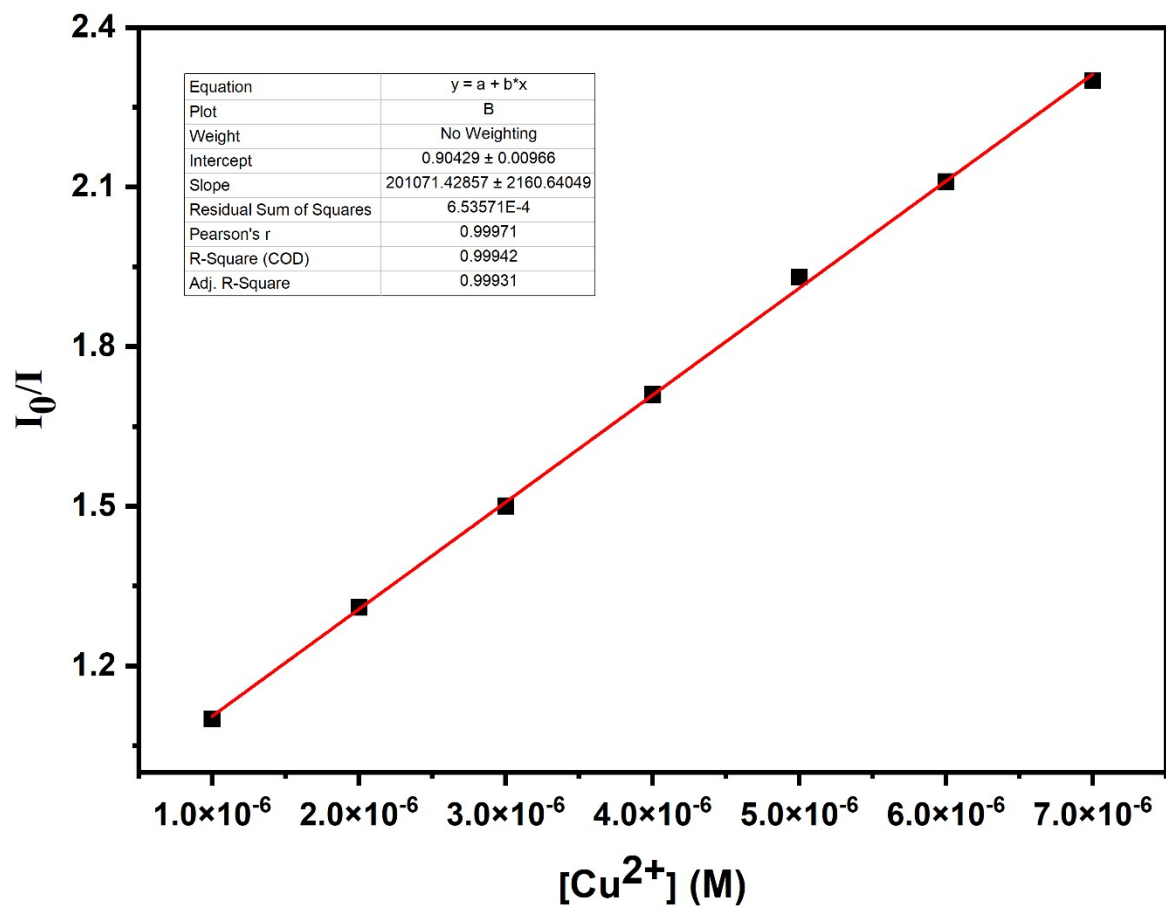

Fig. S7. Stern-volmer plot at low copper ion concentration

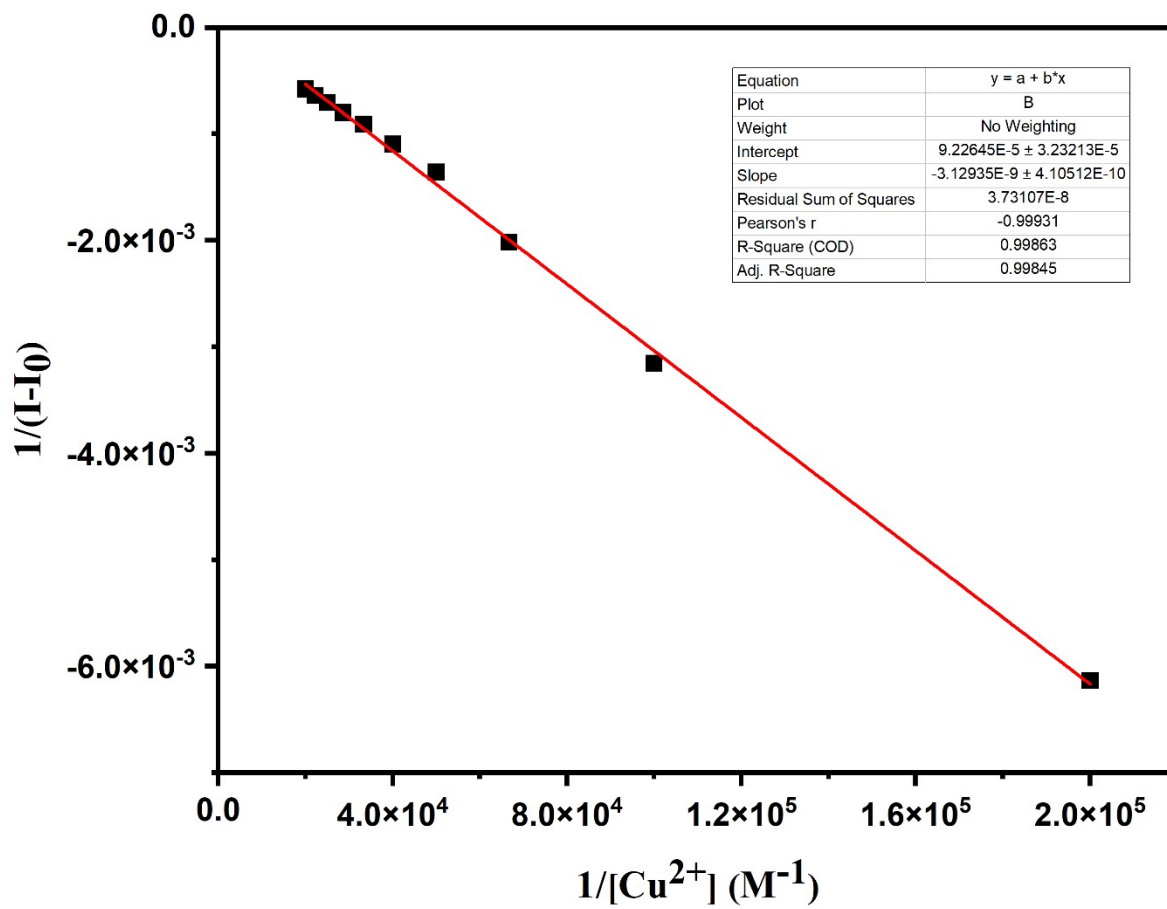

Fig. S8. BH-plot for binding constant determination

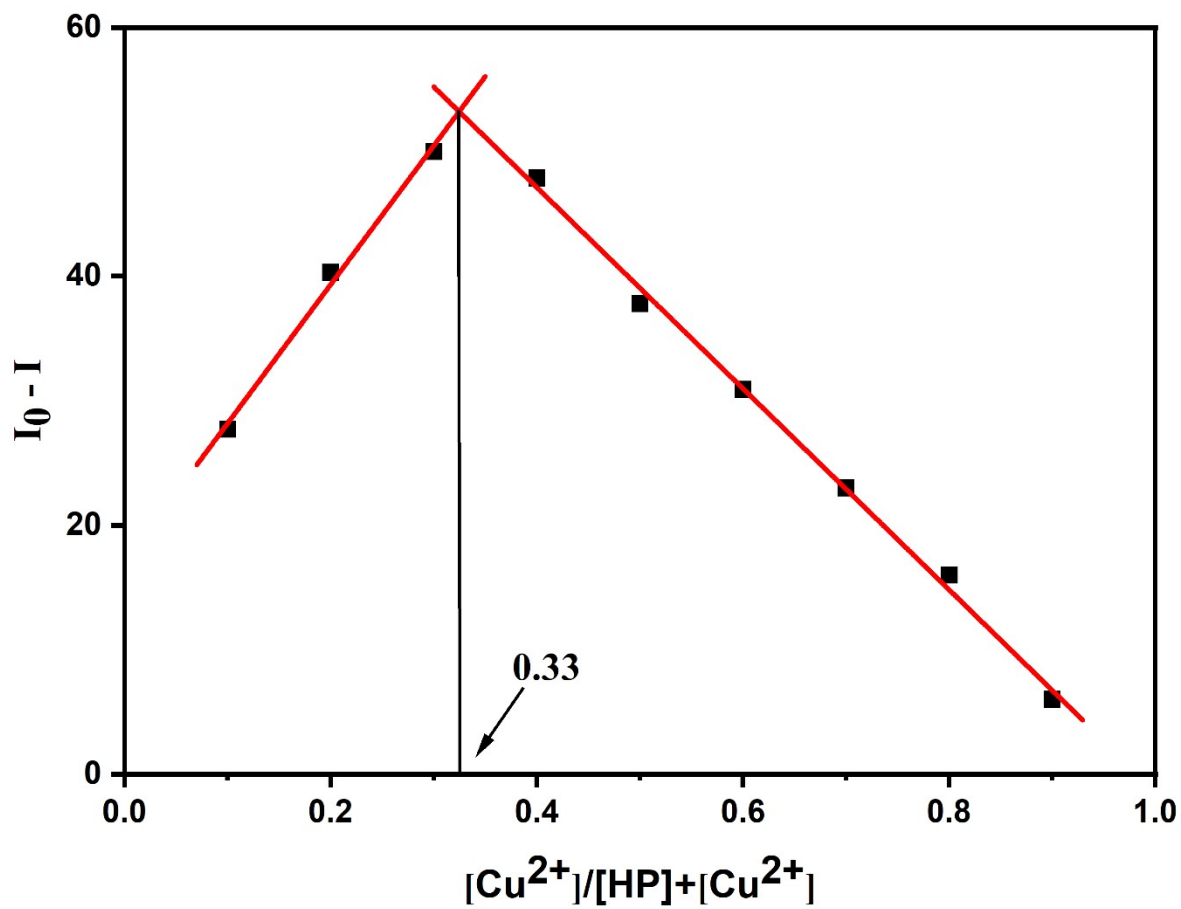

Fig. S9. Job's plot for binding stoichiometry determination

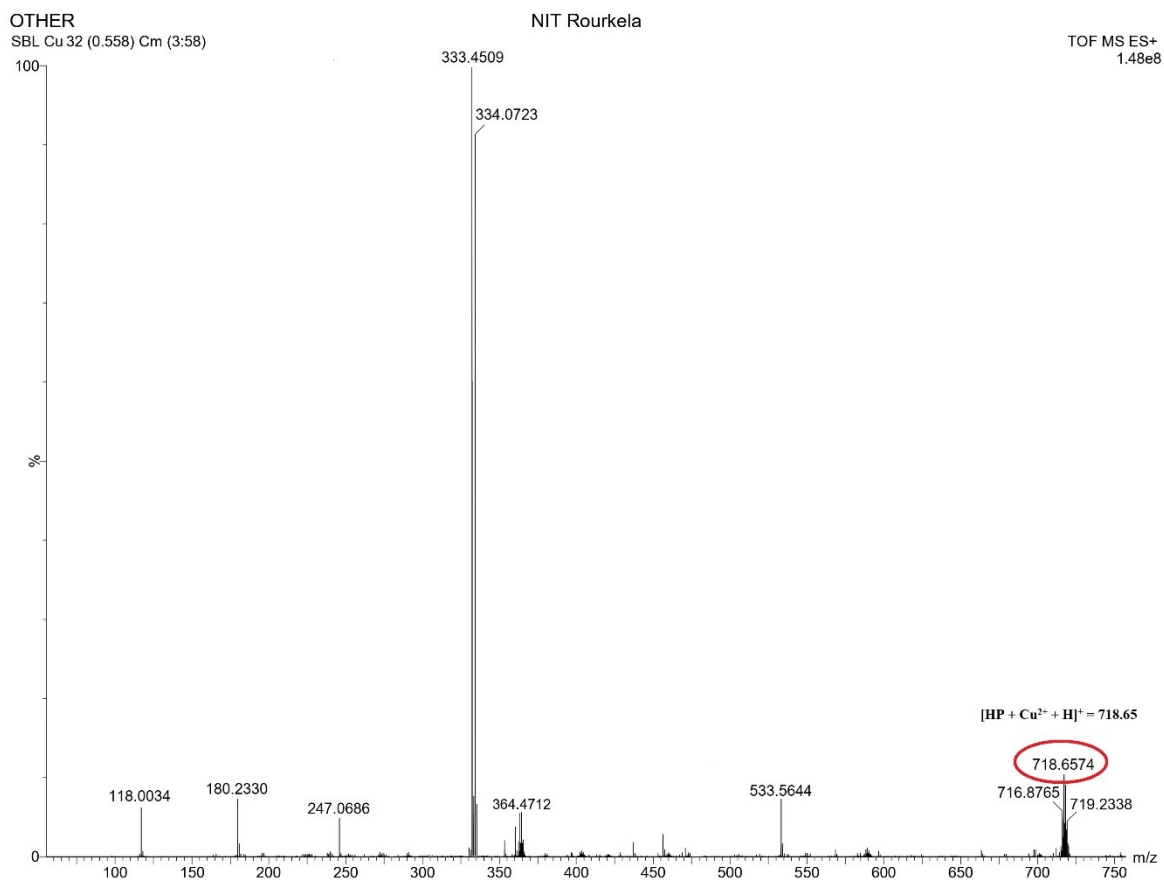

**Fig. S10.** ESI-MS spectra of [HP+Cu<sup>2+</sup>] complex

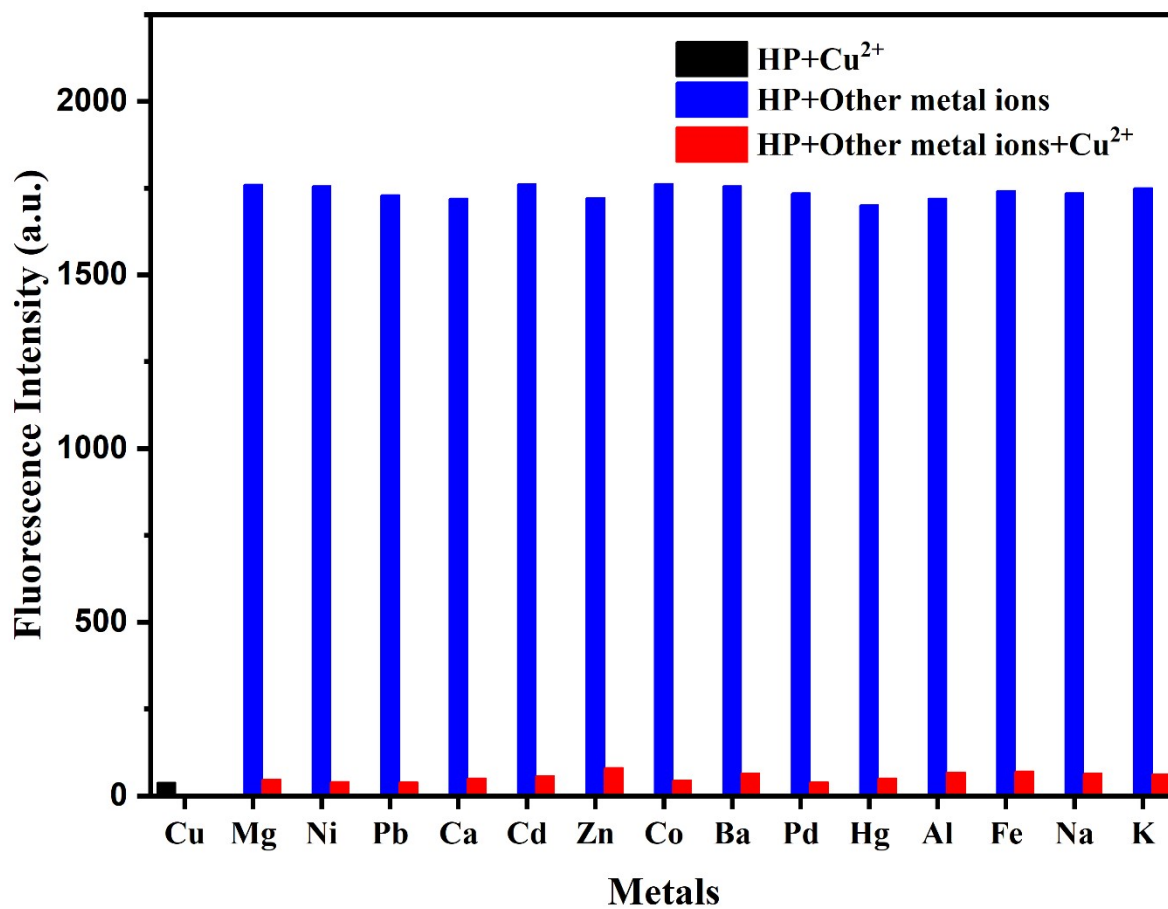

**Fig. S11.** Bar diagram illustrating the interference study of probe HP for Cu<sup>2+</sup> (50μM) detection in the presence of various competing metal ions (100μM)

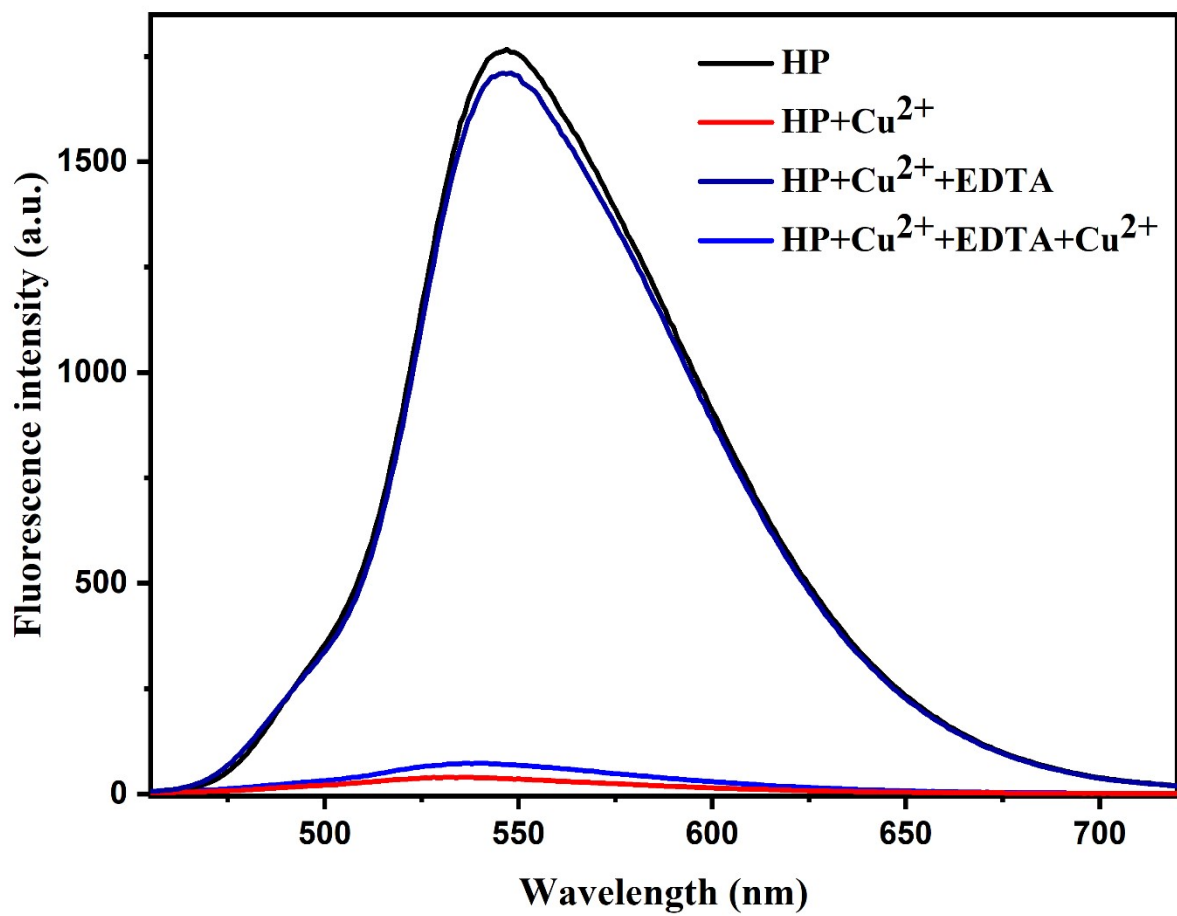

Fig. S12. Fluorescence spectra of reversibility study

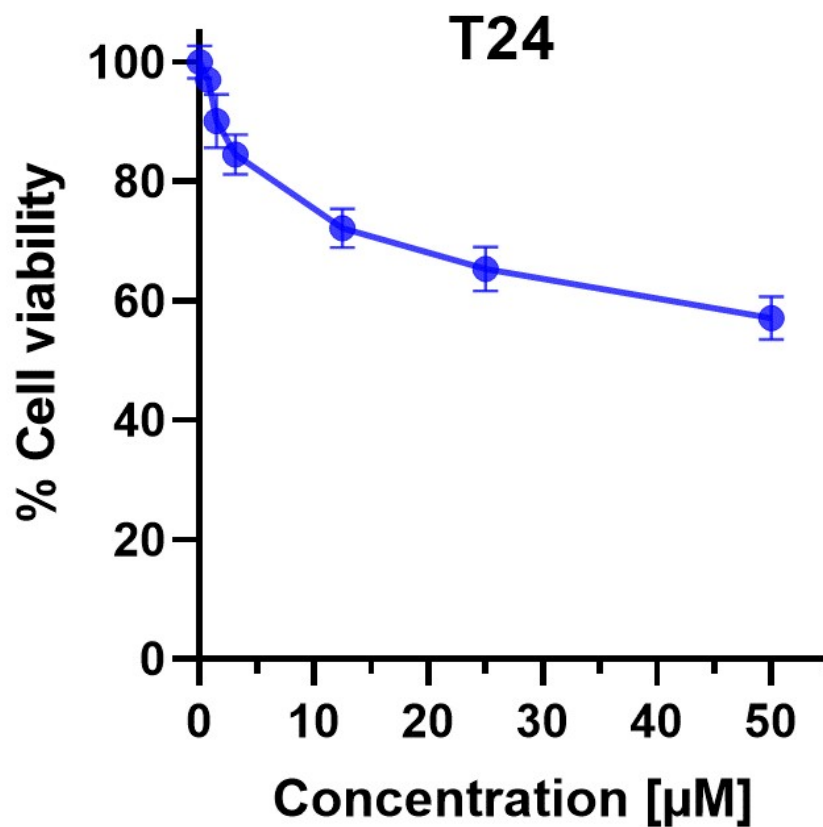

**Fig. S13.** Cell viability assay of probe **HP**

**Table S1.** A comparison of previously published sensors based on detection of  $\text{Cu}^{2+}$  ions.

| S. No. | Chemosensor used | Solvent used | $\lambda_{\text{em}}$ (nm) | LOD value (M) | Fluorescence strategy | Reference |
|--------|------------------|--------------|----------------------------|---------------|-----------------------|-----------|
|        |                  |              |                            |               |                       |           |

|   |                                                                                     |                                   |     |                         |                       |      |
|---|-------------------------------------------------------------------------------------|-----------------------------------|-----|-------------------------|-----------------------|------|
| 1 | 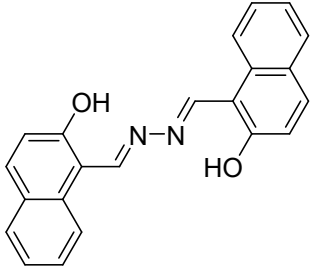   | ACN-H <sub>2</sub> O              | 530 | 10 x 10 <sup>-9</sup>   | AIE-based<br>turn-off | [9]  |
| 2 |    | ACN-H <sub>2</sub> O              | 534 | 200 x 10 <sup>-9</sup>  | AIE-based<br>turn-off | [9]  |
| 3 |    | THF-H <sub>2</sub> O              | 565 | 6.7 x 10 <sup>-8</sup>  | AIE-based<br>turn-OFF | [10] |
| 4 |  | THF-H <sub>2</sub> O              | 600 | 12.6 x 10 <sup>-8</sup> | AIE-based<br>turn-OFF | [10] |
| 5 |  | ACN-H <sub>2</sub> O<br>(1:9 v/v) | 536 | 1 x 10 <sup>-7</sup>    | AIE-based<br>turn-off | [11] |
| 6 |  | DMF-H <sub>2</sub> O              | 430 | 35 x 10 <sup>-9</sup>   | AEE turn ON           | [12] |

|    |                                                                                     |                                                                             |          |                       |                                       |      |
|----|-------------------------------------------------------------------------------------|-----------------------------------------------------------------------------|----------|-----------------------|---------------------------------------|------|
| 7  | 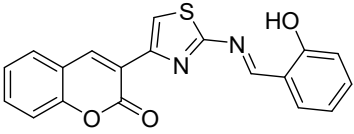   | DMSO-<br>HEPES<br>buffer<br>(2:8 v/v)                                       | 544      | $24 \times 10^{-9}$   | AIE-based<br>turn ON-OFF              | [13] |
| 8  |    | ACN-<br>water (2:8<br>v/v)                                                  | 549      | $5.90 \times 10^{-5}$ | AIEE-ESIPT-<br>TICT based<br>Turn-OFF | [14] |
| 9  |    | DMSO-<br>H <sub>2</sub> O-<br>MeOH<br>(0.1:1.9:8<br>v/v)<br>HEPES<br>buffer | 464, 536 | $1.52 \times 10^{-7}$ | TICT based<br>turn-OFF                | [15] |
| 10 |  | MeOH-<br>H <sub>2</sub> O<br>(60% v/v)                                      | 516      | $57.2 \times 10^{-9}$ | AIE-ESIPT<br>based turn<br>OFF-ON-OFF | [16] |
| 11 |  | EtOH-<br>PBS (1:1<br>v/v)                                                   | 504      | $0.08 \times 10^{-6}$ | AIE-ESIPT<br>based turn<br>OFF-ON-OFF | [17] |
| 12 |  | DMF-H <sub>2</sub> O<br>(1:9 v/v)                                           | 590      | $5.0 \times 10^{-9}$  | ESIPT-TICT-<br>AIE based turn-<br>off | [18] |

|    |                                                                                     |                                     |          |                        |                                   |      |
|----|-------------------------------------------------------------------------------------|-------------------------------------|----------|------------------------|-----------------------------------|------|
| 13 | 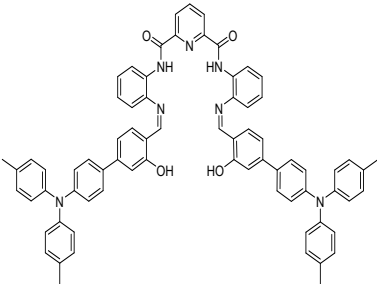   | THF-H <sub>2</sub> O                | 525-576  | $2.687 \times 10^{-7}$ | AIE-ESIPT<br>bases turn           | [19] |
| 14 |    | THF-H <sub>2</sub> O<br>(5/95, v/v) | 550-560  | $8.3 \times 10^{-7}$   | AIE based<br>Turn OFF             | [20] |
| 15 |   | DMSO-<br>HEPES,<br>(40:60,<br>v/v)  | 530, 570 | $32.9 \times 10^{-9}$  | AIE-based<br>turn OFF             | [21] |
| 16 |  | THF                                 | 588      | $1.8 \times 10^{-7}$   | AIE-ESIPT<br>based turn<br>ON-OFF | [22] |

|    |                                                                                                                                                                                                                                                                                                        |                                                                 |               |                                                       |                                   |              |
|----|--------------------------------------------------------------------------------------------------------------------------------------------------------------------------------------------------------------------------------------------------------------------------------------------------------|-----------------------------------------------------------------|---------------|-------------------------------------------------------|-----------------------------------|--------------|
| 17 | 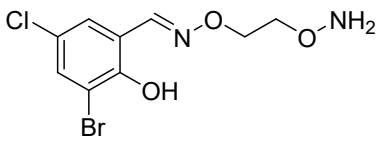                                                                                                                                                                                                                      | EtOH-<br>H <sub>2</sub> O                                       | 467           | 48.59 x<br>10 <sup>-9</sup>                           | AIE-based turn<br>ON-OFF-ON       | [23]         |
| 18 |                                                                                                                                                                                                                       | THF-<br>water (1:9<br>v/v)                                      | 618           | 9.91 x 10 <sup>-8</sup>                               | AIE-ESIPT<br>based turn<br>ON-OFF | [24]         |
| 19 |  <p>BSDPA: R<sub>1</sub> = H, R<sub>2</sub> = Br<br/>DBSDPA: R<sub>1</sub> = Br, R<sub>2</sub> = Br<br/>DTSDPA: R<sub>1</sub> = ditert, R<sub>2</sub> = ditert<br/>MSDPA: R<sub>1</sub> = H, R<sub>2</sub> = OMe</p> | ACN-<br>aq.buffer<br>(1:9 v/v)<br>pH 7.4<br>Phosphate<br>buffer | 560 to<br>600 | 5.4 x 10 <sup>-9</sup><br>-12.1 x<br>10 <sup>-9</sup> | AIE-ESIPT<br>turn-OFF             | [25]         |
| 20 |                                                                                                                                                                                                                     | THF-<br>water<br>(1:9 v/v)                                      | 550           | 4.7 x 10 <sup>-9</sup>                                | AIE-based<br>turn-OFF             | This<br>work |

## References:

- [1] A. Jain, P. Saraswat, S. De, H. Roy, B. Nath, S.S. Ghosh, P. Barman, Position-induced

- differential aggregation behavior with red-shifted emission: A case study of the promising copper ion sensor skeleton-based regio-isomers, *J. Photochem. Photobiol. A Chem.* 458 (2025) 115931.
- [2] A. Schiafer, H. Horn, R. Ahlrichs, Fully optimized contracted Gaussian basis sets for atoms Li to Kr, *J. Chem. Phys.* 97 (1992) 2571.
- [3] A.D. Becke, Density-functional thermochemistry. III. The role of exact exchange, *J. Chem. Phys.* 98 (1993) 5648–5652.
- [4] C.W. Bauschlicher Jr, H. Partridge, A modification of the Gaussian-2 approach using density functional theory, *J. Chem. Phys.* 103 (1995) 1788–1791.
- [5] M.J. Snare, F.E. Treloar, K.P. Ghiggino, P.J. Thistlethwaite, The photophysics of rhodamine B, *J. Photochem.* 18 (1982) 335–346.
- [6] M. Arshad, A. Paul, A. Joseph, Nanoscale detection of copper using an aggregation induced emission enhancement fluorescent sensor derived from hydroxy naphthaldehyde and benzyloxy benzaldehyde, *J. Photochem. Photobiol. A Chem.* 444 (2023) 114983.
- [7] X.-J. Yan, Z.-G. Wang, Y. Wang, Y.-Y. Huang, H.-B. Liu, C.-Z. Xie, Q.-Z. Li, J.-Y. Xu, A dual-functional fluorescent probe for sequential determination of  $\text{Cu}^{2+}/\text{S}^{2-}$  and its applications in biological systems, *Spectrochim. Acta Part A Mol. Biomol. Spectrosc.* 243 (2020) 118797.
- [8] J.R. Lakowicz, Instrumentation for fluorescence spectroscopy, in: *Princ. Fluoresc. Spectrosc.*, Springer, 1999: pp. 25–61.
- [9] B. Liu, H. Zhou, B. Yang, X. Hu, Aggregation-induced emission activity and further  $\text{Cu}^{2+}$ -induced self-assembly process of two Schiff compounds, *Sensors Actuators B Chem.* 246 (2017) 554–562. <https://doi.org/10.1016/j.snb.2017.02.120>.
- [10] Z. Wang, F. Zhou, C. Gui, J. Wang, Z. Zhao, A. Qin, B.Z. Tang, Selective and sensitive fluorescent probes for metal ions based on AIE dots in aqueous media, *J. Mater. Chem. C* 6 (2018) 11261–11265. <https://doi.org/10.1039/C8TC03711F>.
- [11] H. Zhou, B. Yang, G. Wen, X. Hu, B. Liu, Assembly and disassembly activity of two

- AIEE model compounds and its potential application, *Talanta* 184 (2018) 394–403.  
<https://doi.org/10.1016/j.talanta.2018.03.007>.
- [12] W.-N. Wu, P.-D. Mao, Y. Wang, X.-J. Mao, Z.-Q. Xu, Z.-H. Xu, X.-L. Zhao, Y.-C. Fan, X.-F. Hou, AEE active Schiff base-bearing pyrene unit and further Cu<sup>2+</sup>-induced self-assembly process, *Sensors Actuators B Chem.* 258 (2018) 393–401.  
<https://doi.org/10.1016/j.snb.2017.11.114>.
- [13] S.K. Padhan, N. Murmu, S. Mahapatra, M.K. Dalai, S.N. Sahu, Ultrasensitive detection of aqueous Cu<sup>2+</sup> ions by a coumarin-salicylidene based AIEgen, *Mater. Chem. Front.* 3 (2019) 2437–2447.
- [14] N. Miengmern, A. Koonwong, S. Sriyab, A. Suramitr, R.P. Poo-arporn, S. Hannongbua, S. Suramitr, Aggregation-induced emission enhancement (AIEE) of N,N'-Bis(Salicylidene)-p-Phenylenediamine Schiff base: Synthesis, photophysical properties and its DFT studies, *J. Lumin.* 210 (2019) 493–500.  
<https://doi.org/10.1016/j.jlumin.2019.02.023>.
- [15] R. Yadav, A. Rai, A.K. Sonkar, V. Rai, S.C. Gupta, L. Mishra, A viscochromic, mechanochromic, and unsymmetrical azine for selective detection of Al<sup>3+</sup> and Cu<sup>2+</sup> ions and its mitotracking studies, *New J. Chem.* 43 (2019) 7109–7119.  
<https://doi.org/10.1039/C8NJ06413J>.
- [16] R. Das, S. Bej, H. Hirani, P. Banerjee, Trace-Level Humidity Sensing from Commercial Organic Solvents and Food Products by an AIE/ESIPT-Triggered Piezochromic Luminogen and ppb-Level “OFF–ON–OFF” Sensing of Cu<sup>2+</sup> : A Combined Experimental and Theoretical Outcome, *ACS Omega* 6 (2021) 14104–14121.  
<https://doi.org/10.1021/acsomega.1c00565>.
- [17] W. Pan, X. Yang, Y. Wang, L. Wu, N. Liang, L. Zhao, AIE-ESIPT based colorimetric and “OFF-ON-OFF” fluorescence Schiff base sensor for visual and fluorescent determination of Cu<sup>2+</sup> in an aqueous media, *J. Photochem. Photobiol. A Chem.* 420 (2021) 113506.  
<https://doi.org/10.1016/j.jphotochem.2021.113506>.
- [18] A.A. Bhosle, S.D. Hiremath, A.C. Bhasikuttan, M. Banerjee, A. Chatterjee, Solvent-free

- mechanochemical synthesis of a novel benzothiazole-azine based ESIPT-coupled orange AIEgen for the selective recognition of Cu<sup>2+</sup> ions in solution and solid phase, *J. Photochem. Photobiol. A Chem.* 413 (2021) 113265.  
<https://doi.org/10.1016/j.jphotochem.2021.113265>.
- [19] X. Zhang, S.-T. Wu, X.-J. Yang, L.-Y. Shen, Y.-L. Huang, H. Xu, Q.-L. Zhang, T. Sun, C. Redshaw, X. Feng, Dynamic Coordination between a Triphenylamine-Functionalized Salicylaldehyde Schiff Base and a Copper(II) Ion, *Inorg. Chem.* 60 (2021) 8581–8591.  
<https://doi.org/10.1021/acs.inorgchem.1c00523>.
- [20] H. Wu, L. Lin, L. Zheng, H. Guo, F. Yang, Dual-response fluorescence sensor for detecting Cu<sup>2+</sup> and Pd<sup>2+</sup> based on bis-tetraphenylimidazole Schiff-base, *J. Photochem. Photobiol. A Chem.* 432 (2022) 114076.  
<https://doi.org/10.1016/j.jphotochem.2022.114076>.
- [21] V. Bhardwaj, S.K. Ashok Kumar, S.K. Sahoo, Fluorescent sensing (Cu<sup>2+</sup> and pH) and visualization of latent fingerprints using an AIE-active naphthaldehyde-pyridoxal conjugated Schiff base, *Microchem. J.* 178 (2022) 107404.  
<https://doi.org/10.1016/j.microc.2022.107404>.
- [22] L. Shen, C.-J. Yu, H.-F. Xie, N. Xu, H. Xu, Y.-L. Huang, C. Redshaw, X. Feng, Q.-L. Zhang, Naphthaldehyde-based Schiff base dyes: aggregation-induced emission and high-contrast reversible mechanochromic luminescence, *Mater. Chem. Front.* 6 (2022) 2491–2498. <https://doi.org/10.1039/D2QM00542E>.
- [23] Z.-F. Hu, Z.-L. Chai, Y.-R. Zheng, Y.-F. Ding, W.-K. Dong, Y.-J. Ding, A unique AIE multi-responsive half-salicylaldehyde-like fluorescence sensor for temperature, pH and Cu<sup>2+</sup>/S<sup>2-</sup> ions in aqueous media, *Microchem. J.* 190 (2023) 108736.  
<https://doi.org/10.1016/j.microc.2023.108736>.
- [24] Y. Pan, Y. Li, X. Sun, L. Tang, X. Yan, An “AIE+ESIPT” characteristic fluorescent probe for relay recognition of Cu<sup>2+</sup> and H<sub>2</sub>S and its application in food samples and cell imaging, *Dye. Pigment.* 210 (2023) 110985.  
<https://doi.org/10.1016/j.dyepig.2022.110985>.

- [25] A. Jain, S. De, P. Barman, Salicylaldehyde-diphenyl-azine skeleton-based ESIPT-coupled AIEgens with tunable emission and applicable as highly selective and sensitive Cu<sup>2+</sup> ion sensor, *Dye. Pigment.* 220 (2023) 111769. <https://doi.org/10.1016/j.dyepig.2023.111769>.
